# Supplementary material for: SETD2 loss-of-function promotes renal cancer branched evolution through replication stress and impaired DNA repair
Source: PubMed Central journal article supplement — Oncogene. 2015 Mar 2;34(46):5699–708. doi: 10.1038/onc.2015.24 (PMC4660036; doi:10.1038/onc.2015.24), 2015-03-02

Figure S2 ii. Observed H3K36me3 and H3K27me3 frequencies against expected distributions.

Minimal segment length: 2Mb

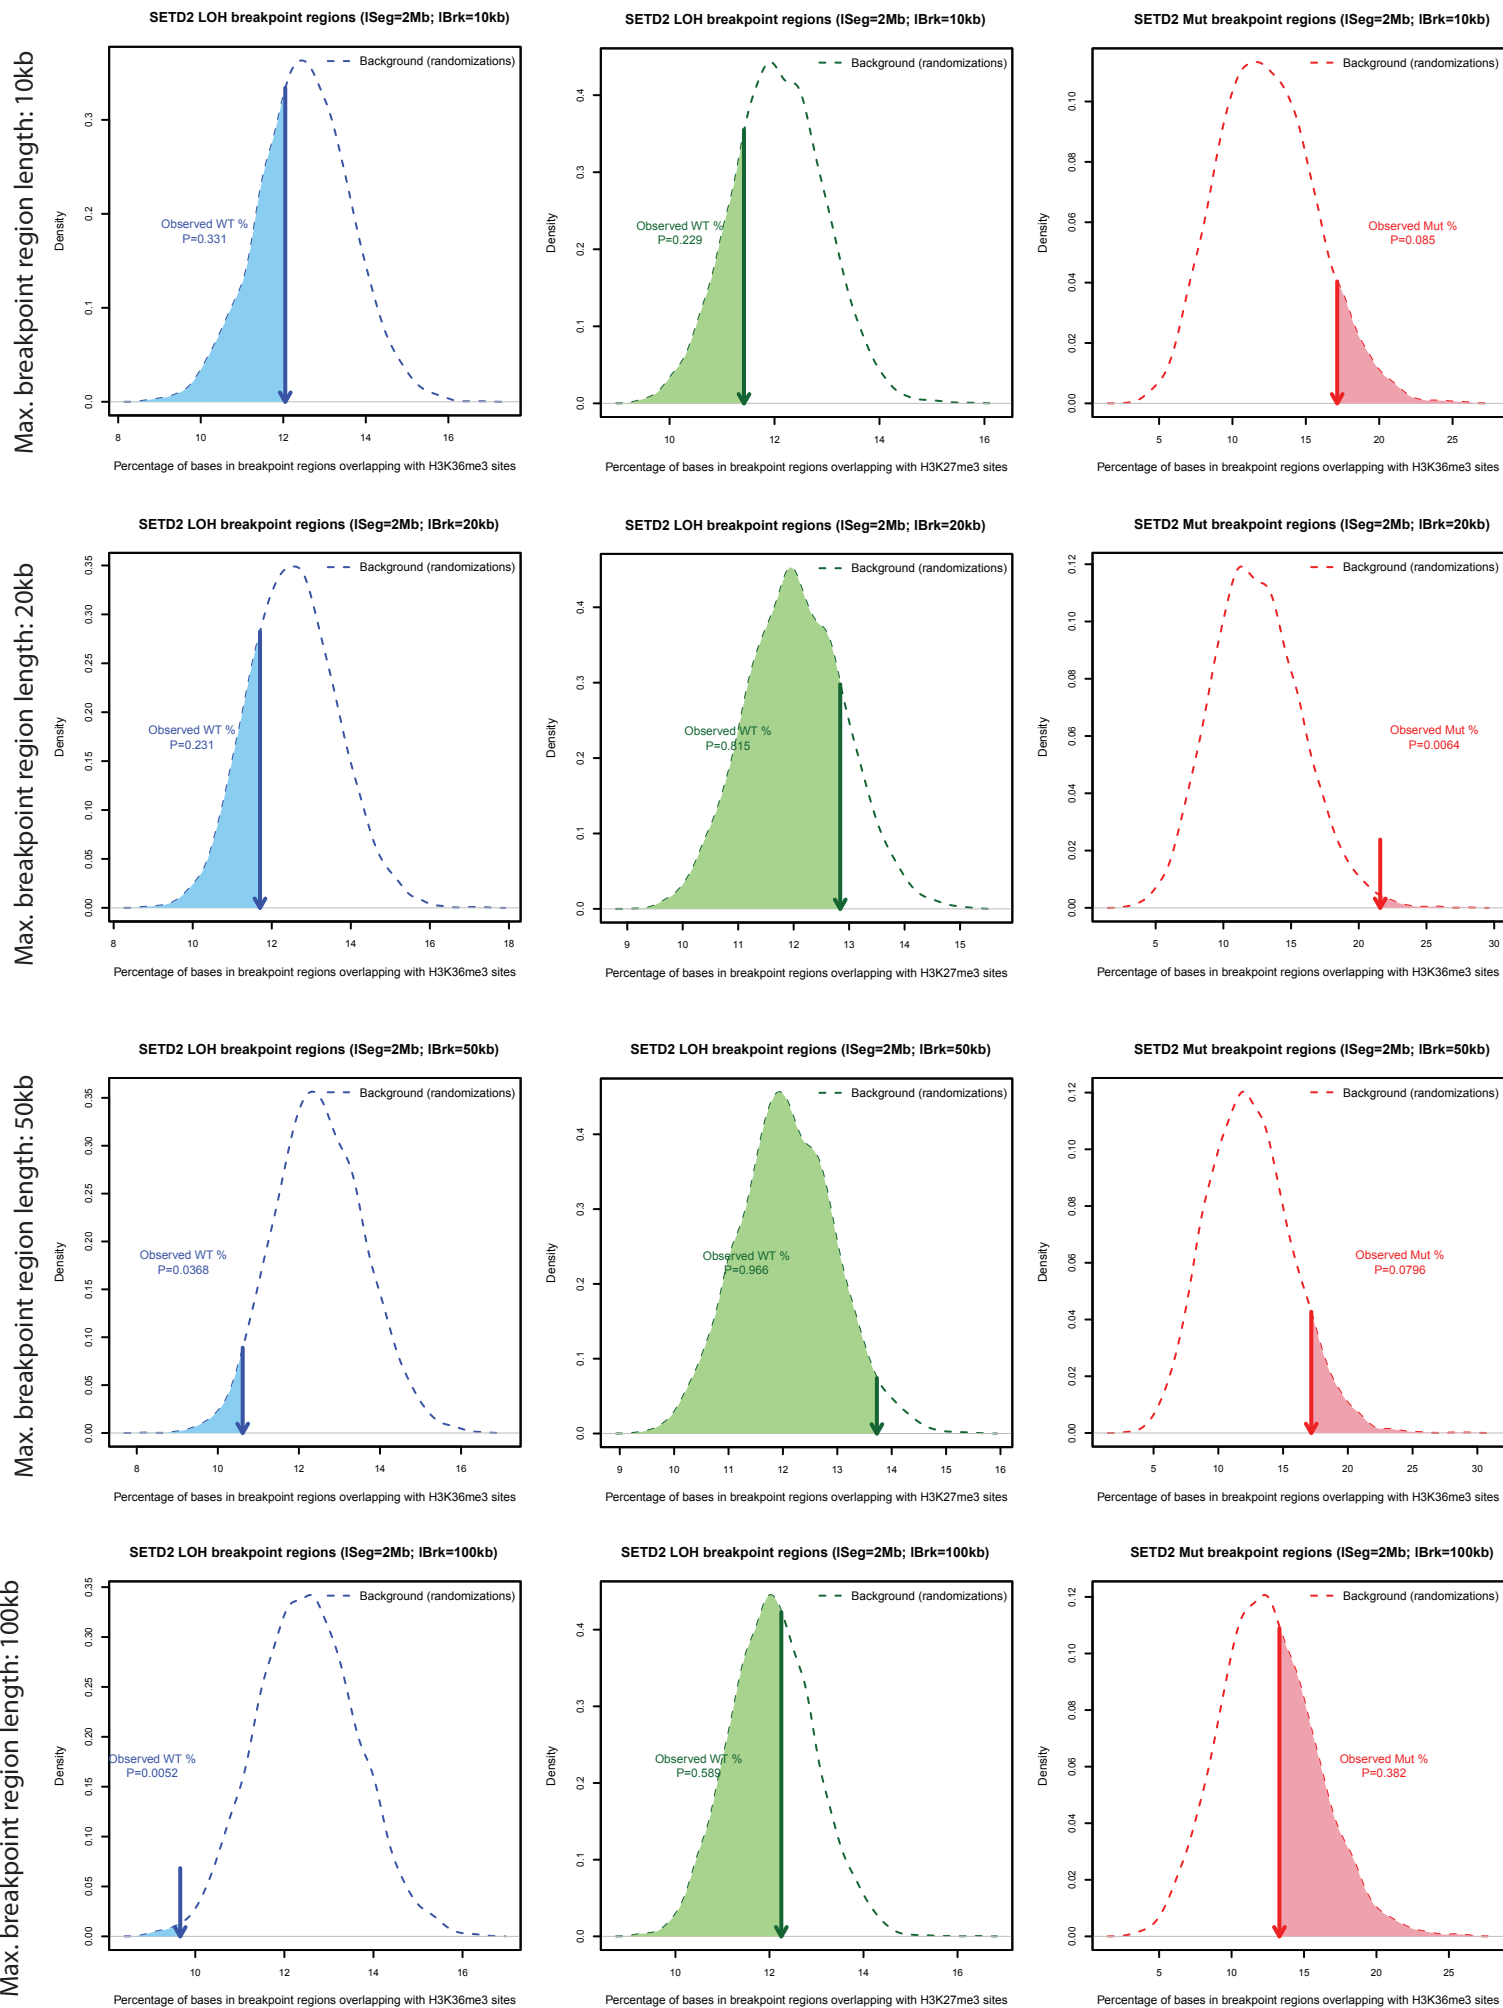

Supplement: NIHMS61748-supplement-Figure_S2ii.pdf [file NIHMS61748-supplement-Figure_S2ii.pdf]
