# Supplementary material for: SETD2 loss-of-function promotes renal cancer branched evolution through replication stress and impaired DNA repair
Source: PubMed Central journal article supplement — Oncogene. 2015 Mar 2;34(46):5699–708. doi: 10.1038/onc.2015.24 (PMC4660036; doi:10.1038/onc.2015.24), 2015-03-02

**Figure S3.** Quantification of H3K36me3 expression and gH2aX staining in 202 samples from 100 independent tumor specimens.

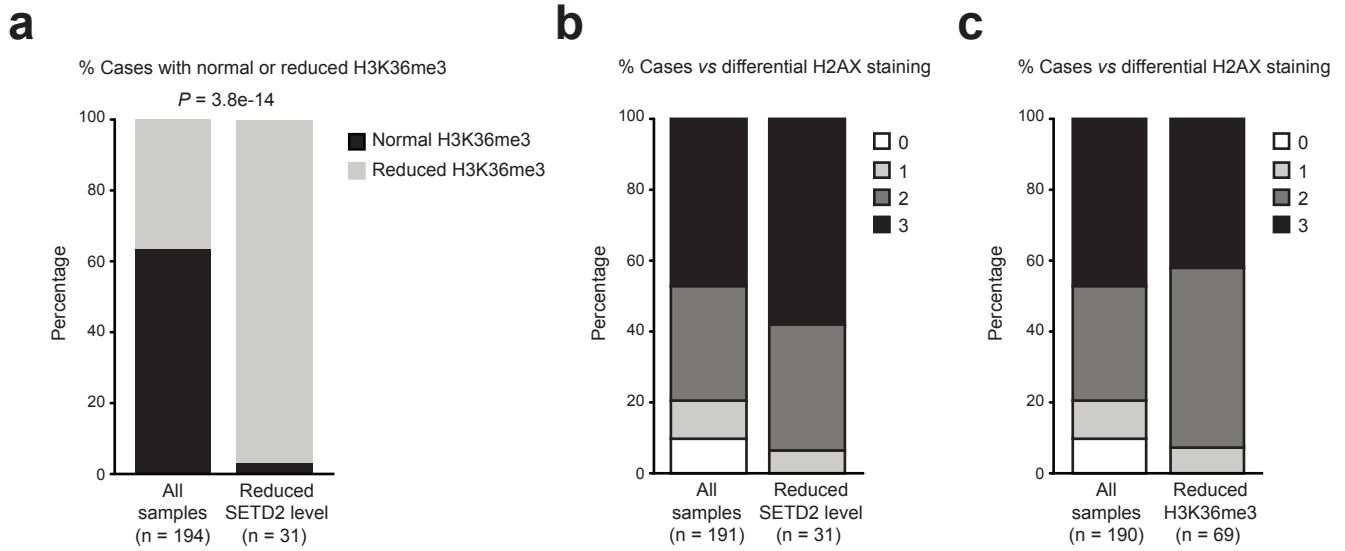

Supplement: NIHMS61748-supplement-Figure_S3.pdf [file NIHMS61748-supplement-Figure_S3.pdf]
