# Supplementary material for: SETD2 loss-of-function promotes renal cancer branched evolution through replication stress and impaired DNA repair
Source: PubMed Central journal article supplement — Oncogene. 2015 Mar 2;34(46):5699–708. doi: 10.1038/onc.2015.24 (PMC4660036; doi:10.1038/onc.2015.24), 2015-03-02
Supplement: NIHMS61748-supplement-Figure_S9.pdf [file NIHMS61748-supplement-Figure_S9.pdf]

**Figure S9.** Basal replication fork rates in SETD2 wild-type and mutant cell lines.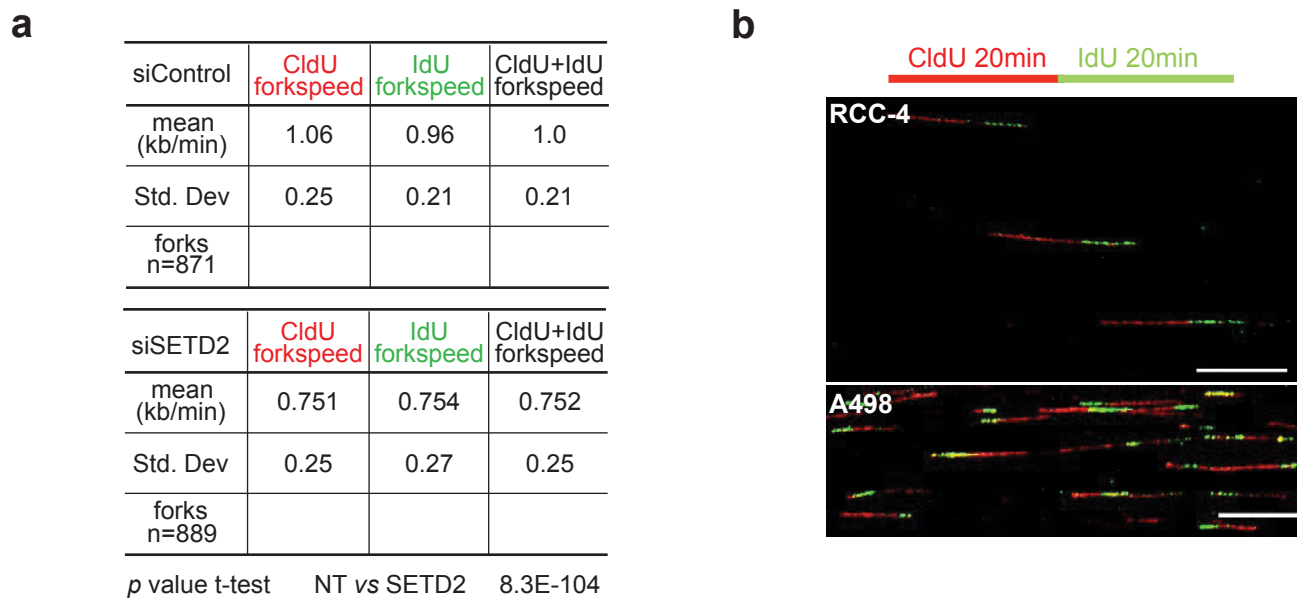

**c**

MOCK

| mean<br>(kb/min) | CldU<br>forkspeed | IdU<br>forkspeed | CldU+IdU<br>forkspeed | forks<br>n= |
|------------------|-------------------|------------------|-----------------------|-------------|
| RCC4             | 1.15+/-0.29       | 1.15+/-0.29      | 1.12+/-0.27           | 583         |
| FG2              | 0.88+/-0.25       | 0.81+/-0.24      | 0.85+/-0.23           | 248         |
| A498             | 0.88+/-0.32       | 0.57+/-0.24      | 0.73+/-0.25           | 1519        |

siControl

| mean<br>(kb/min) | CldU<br>forkspeed | IdU<br>forkspeed | CldU+IdU<br>forkspeed | forks<br>n= |
|------------------|-------------------|------------------|-----------------------|-------------|
| RCC4             | 1.06+/-0.25       | 0.96+/-0.21      | 1.0+/-0.25            | 871         |
| FG2              | 0.86+/-0.23       | 0.83+/-0.23      | 0.84+/-0.22           | 512         |

siSETD2

| mean<br>(kb/min) | CldU<br>forkspeed | IdU<br>forkspeed | CldU+IdU<br>forkspeed | forks<br>n= |
|------------------|-------------------|------------------|-----------------------|-------------|
| RCC4             | 0.75+/-0.25       | 0.75+/-0.27      | 0.75+/-0.25           | 889         |
| FG2              | 0.84+/-0.29       | 0.80+/-0.29      | 0.81+/-0.21           | 759         |
