# Supplementary material for: SETD2 loss-of-function promotes renal cancer branched evolution through replication stress and impaired DNA repair
Source: PubMed Central journal article supplement — Oncogene. 2015 Mar 2;34(46):5699–708. doi: 10.1038/onc.2015.24 (PMC4660036; doi:10.1038/onc.2015.24), 2015-03-02
Supplement: NIHMS61748-supplement-Tables_S4___S5.pdf [file NIHMS61748-supplement-Tables_S4___S5.pdf]

**Supplementary Table 4.**

Percentage of point mutations with H3K36me3 marks in the SETD2mut samples compared to the SETD2LOH samples

| <b>SETD2 status</b> | <b>mutations in H3K36me3 sites</b> | <b>mutations not in H3K36me3 sites</b> | <b>Percentage of mutations in H3K36me3 sites</b> |
|---------------------|------------------------------------|----------------------------------------|--------------------------------------------------|
| <b>Mutant</b>       | 1584                               | 1322                                   | 54.5                                             |
| <b>LOH</b>          | 7973                               | 8908                                   | 47.2                                             |

**Supplementary Table S5.**

Number of samples successful immunohistochemically stained and scored for each marker combination.

|                                | <b>SETD2</b> | <b>H3K36me3</b> | <b><math>\gamma</math>H2AX</b> |
|--------------------------------|--------------|-----------------|--------------------------------|
| <b>SETD2</b>                   | 189          | 194             | 191                            |
| <b>H3K36me3</b>                | 194          | 191             | 190                            |
| <b><math>\gamma</math>H2AX</b> | 191          | 190             | 192                            |
