# Supplementary figures and images for: SETD2 loss-of-function promotes renal cancer branched evolution through replication stress and impaired DNA repair
Source: PubMed Central journal article supplement — Oncogene. 2015 Mar 2;34(46):5699–708. doi: 10.1038/onc.2015.24 (PMC4660036; doi:10.1038/onc.2015.24), 2015-03-02

Figure S2 i. Observed H3K36me3 and H3K27me3 frequencies against expected distributions.

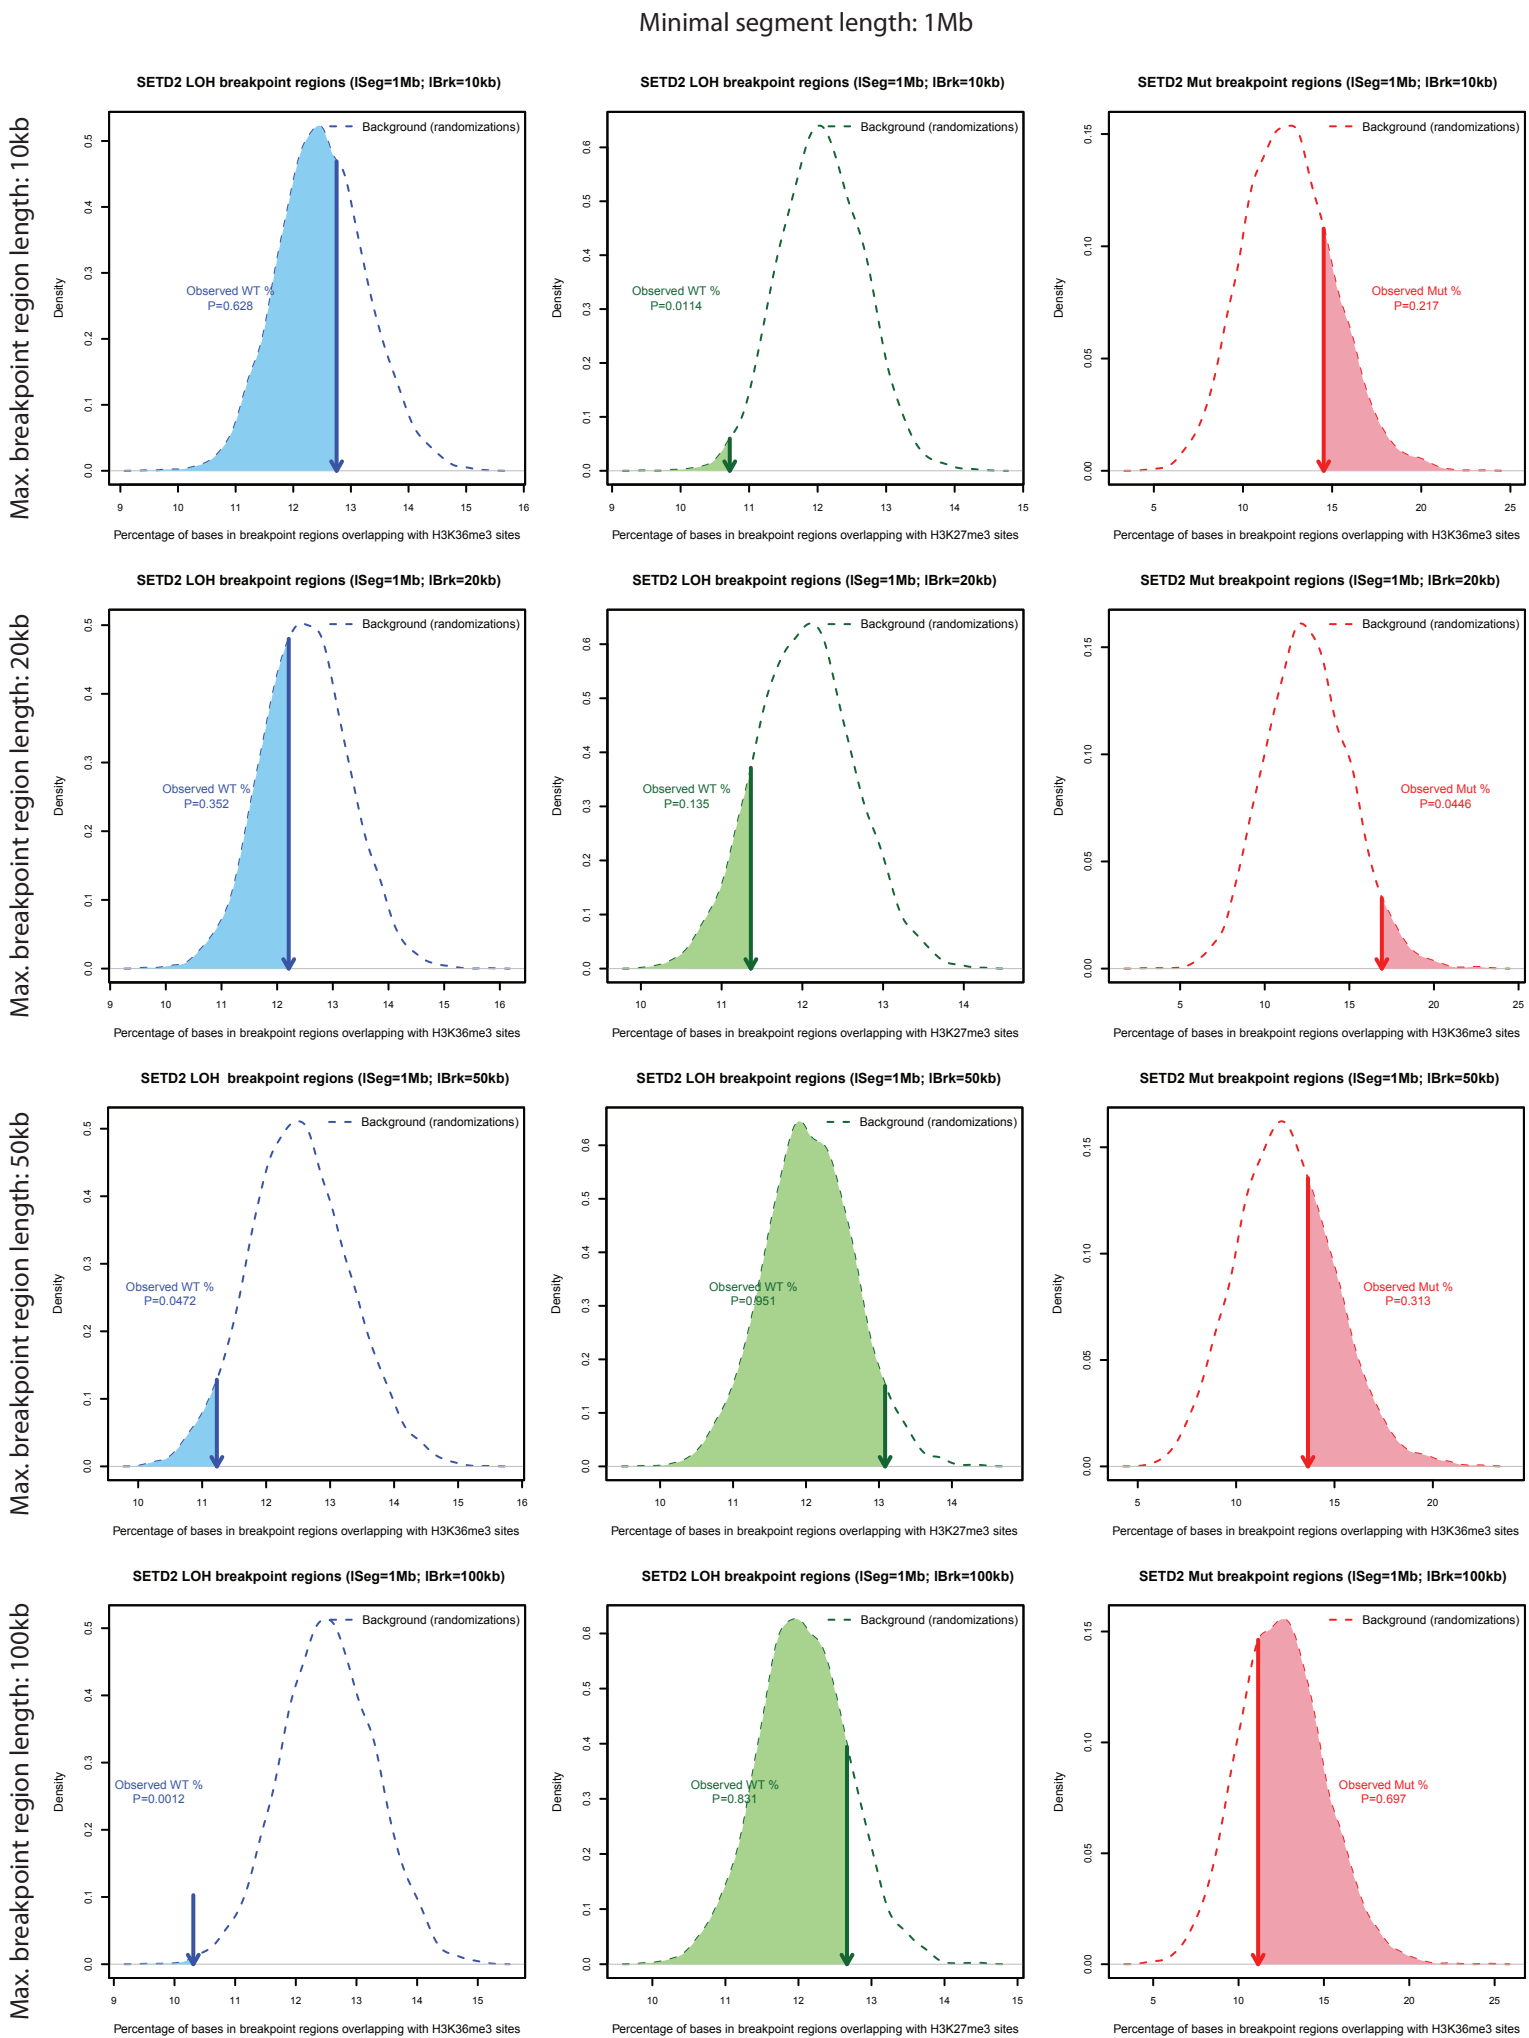

Supplement: NIHMS61748-supplement-Figure_S2i.pdf [file NIHMS61748-supplement-Figure_S2i.pdf]

**Figure S4.** Cell lines and RNA interference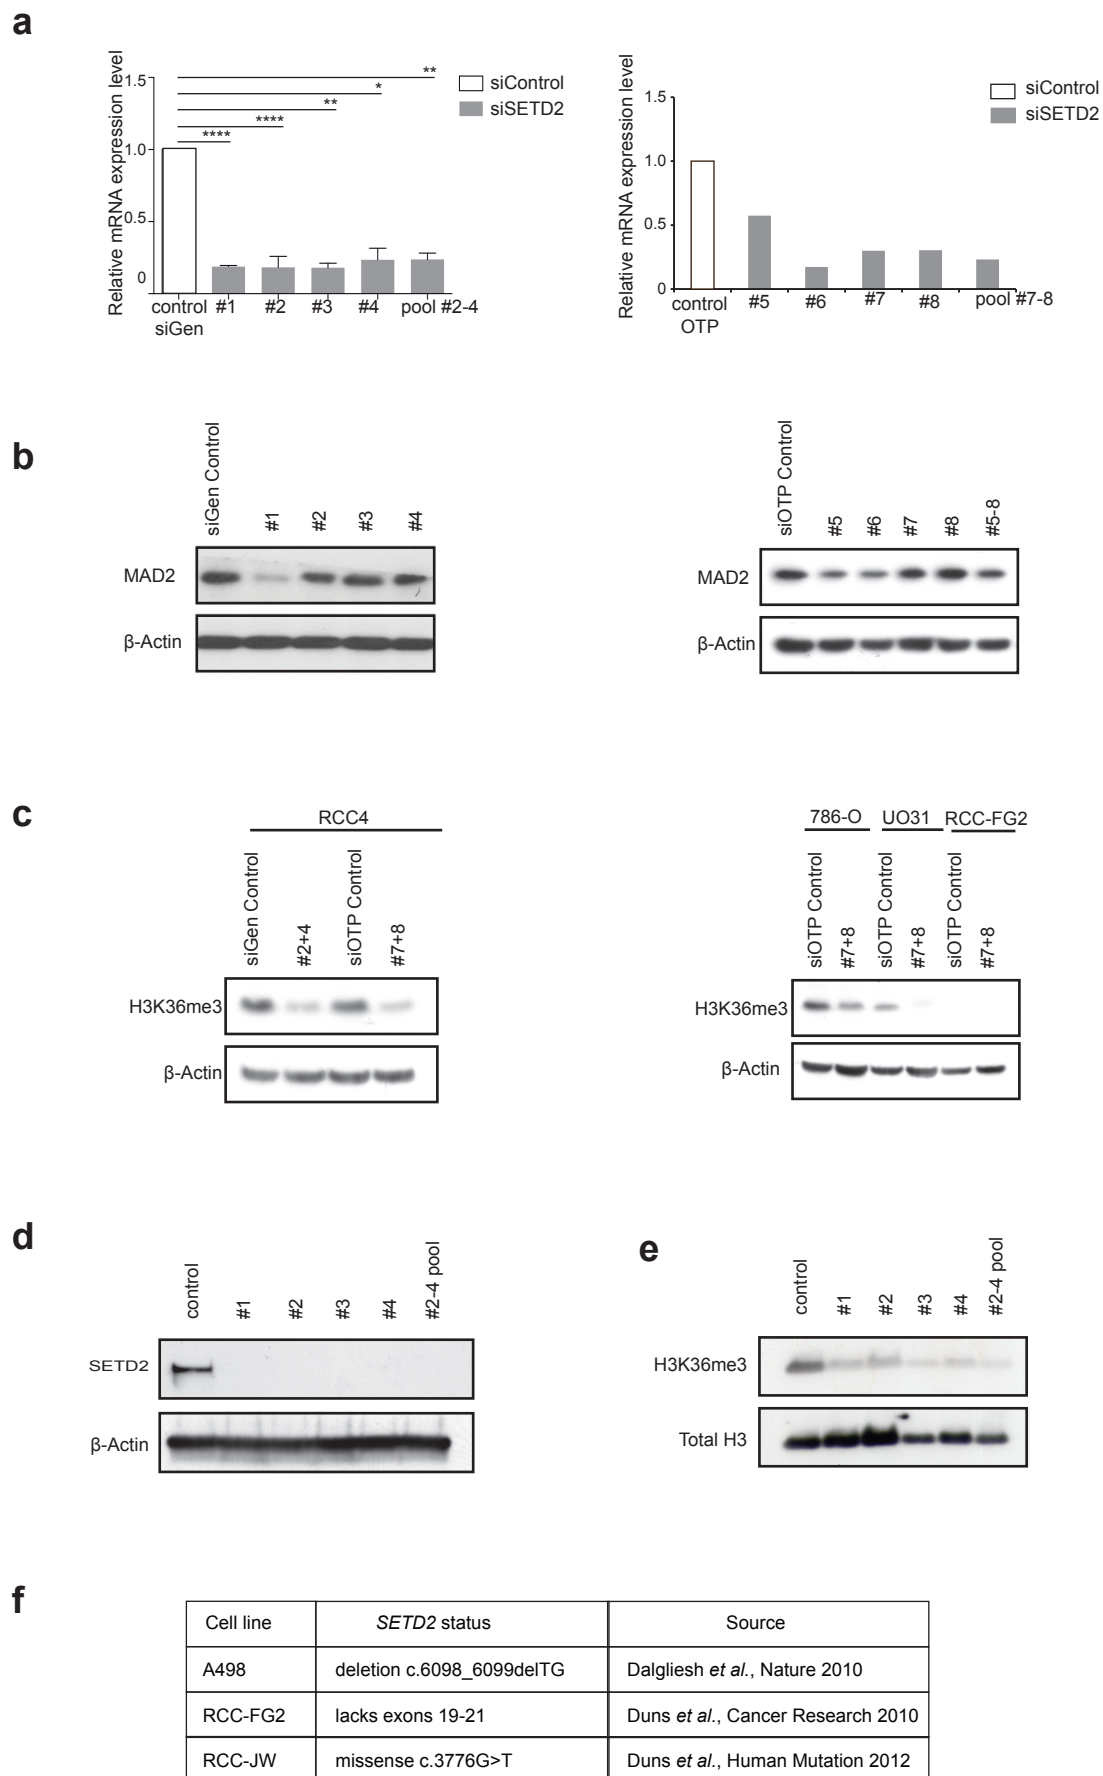

Supplement: NIHMS61748-supplement-Figure_S4.pdf [file NIHMS61748-supplement-Figure_S4.pdf]

**Figure S6.** Mutational loads in primary ccRCC and colon tumors from TCGA datasets.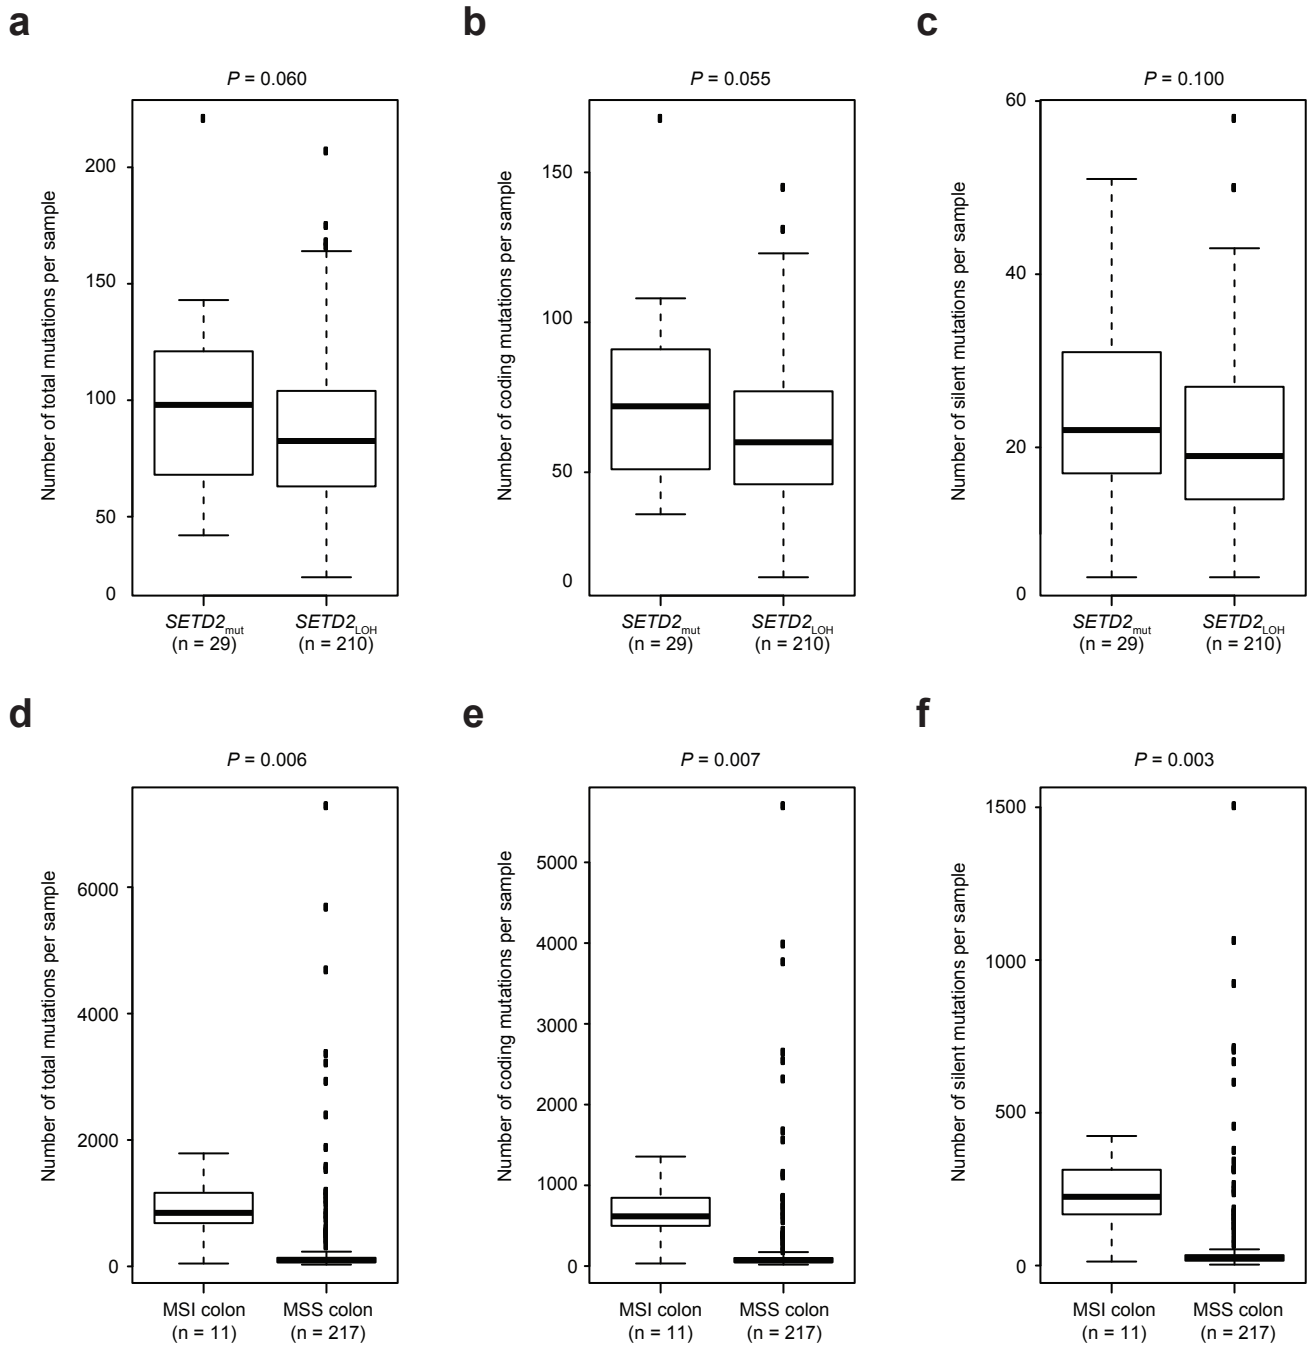

Supplement: NIHMS61748-supplement-Figure_S6.pdf [file NIHMS61748-supplement-Figure_S6.pdf]

**Figure S7 ii** Microsatellite instability analysis in ccRCC primary tumors and cell lines.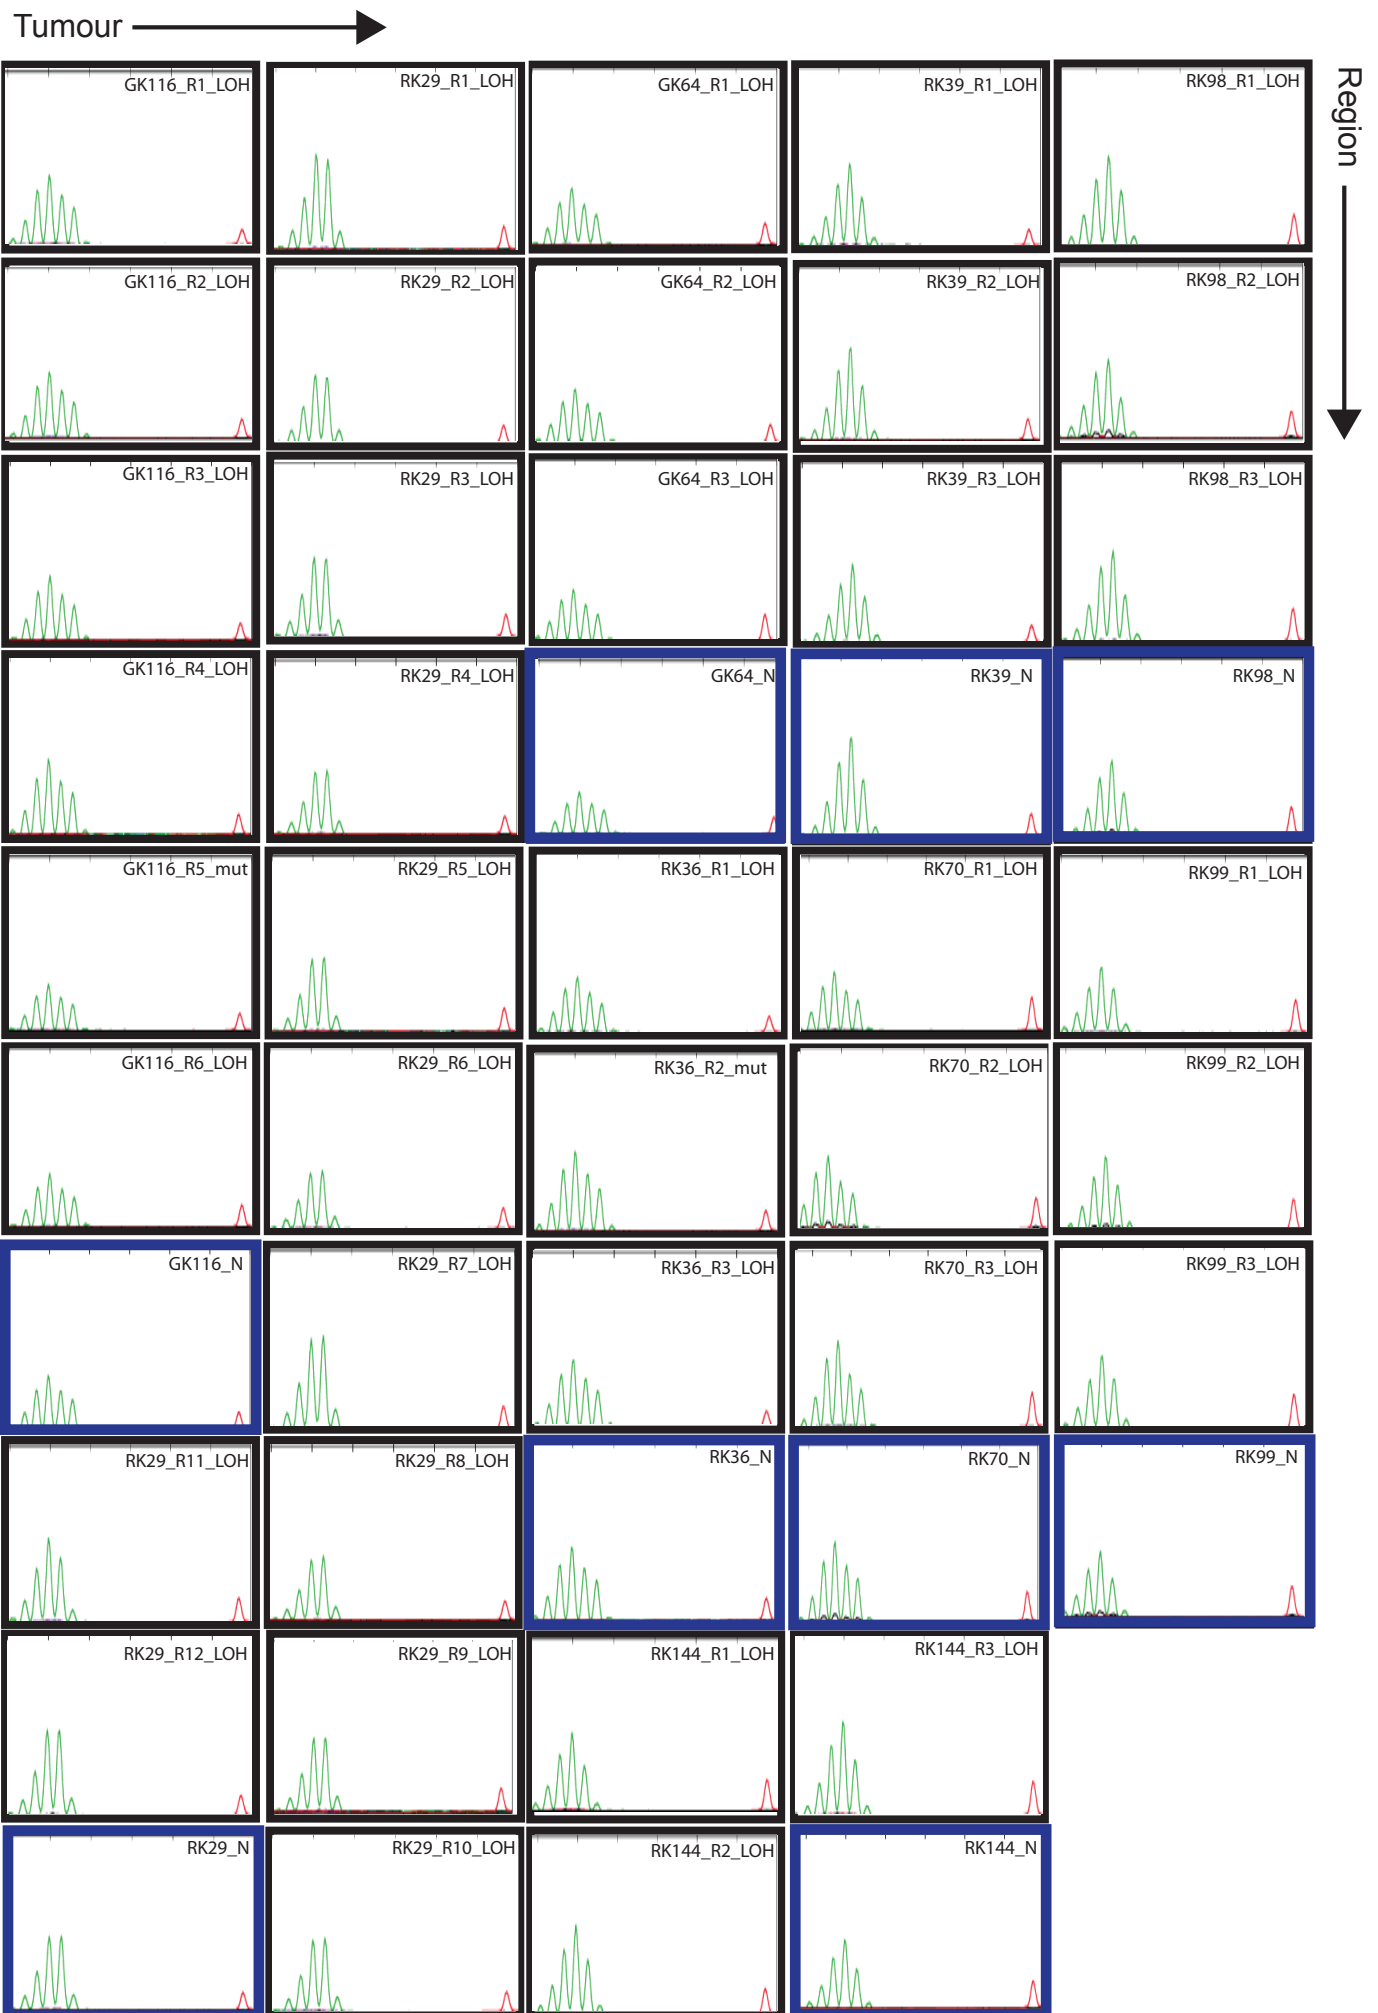

Supplement: NIHMS61748-supplement-Figure_S7ii.pdf [file NIHMS61748-supplement-Figure_S7ii.pdf]

Figure S7v. Microsatellite instability analysis in ccRCC primary tumors and cell lines.

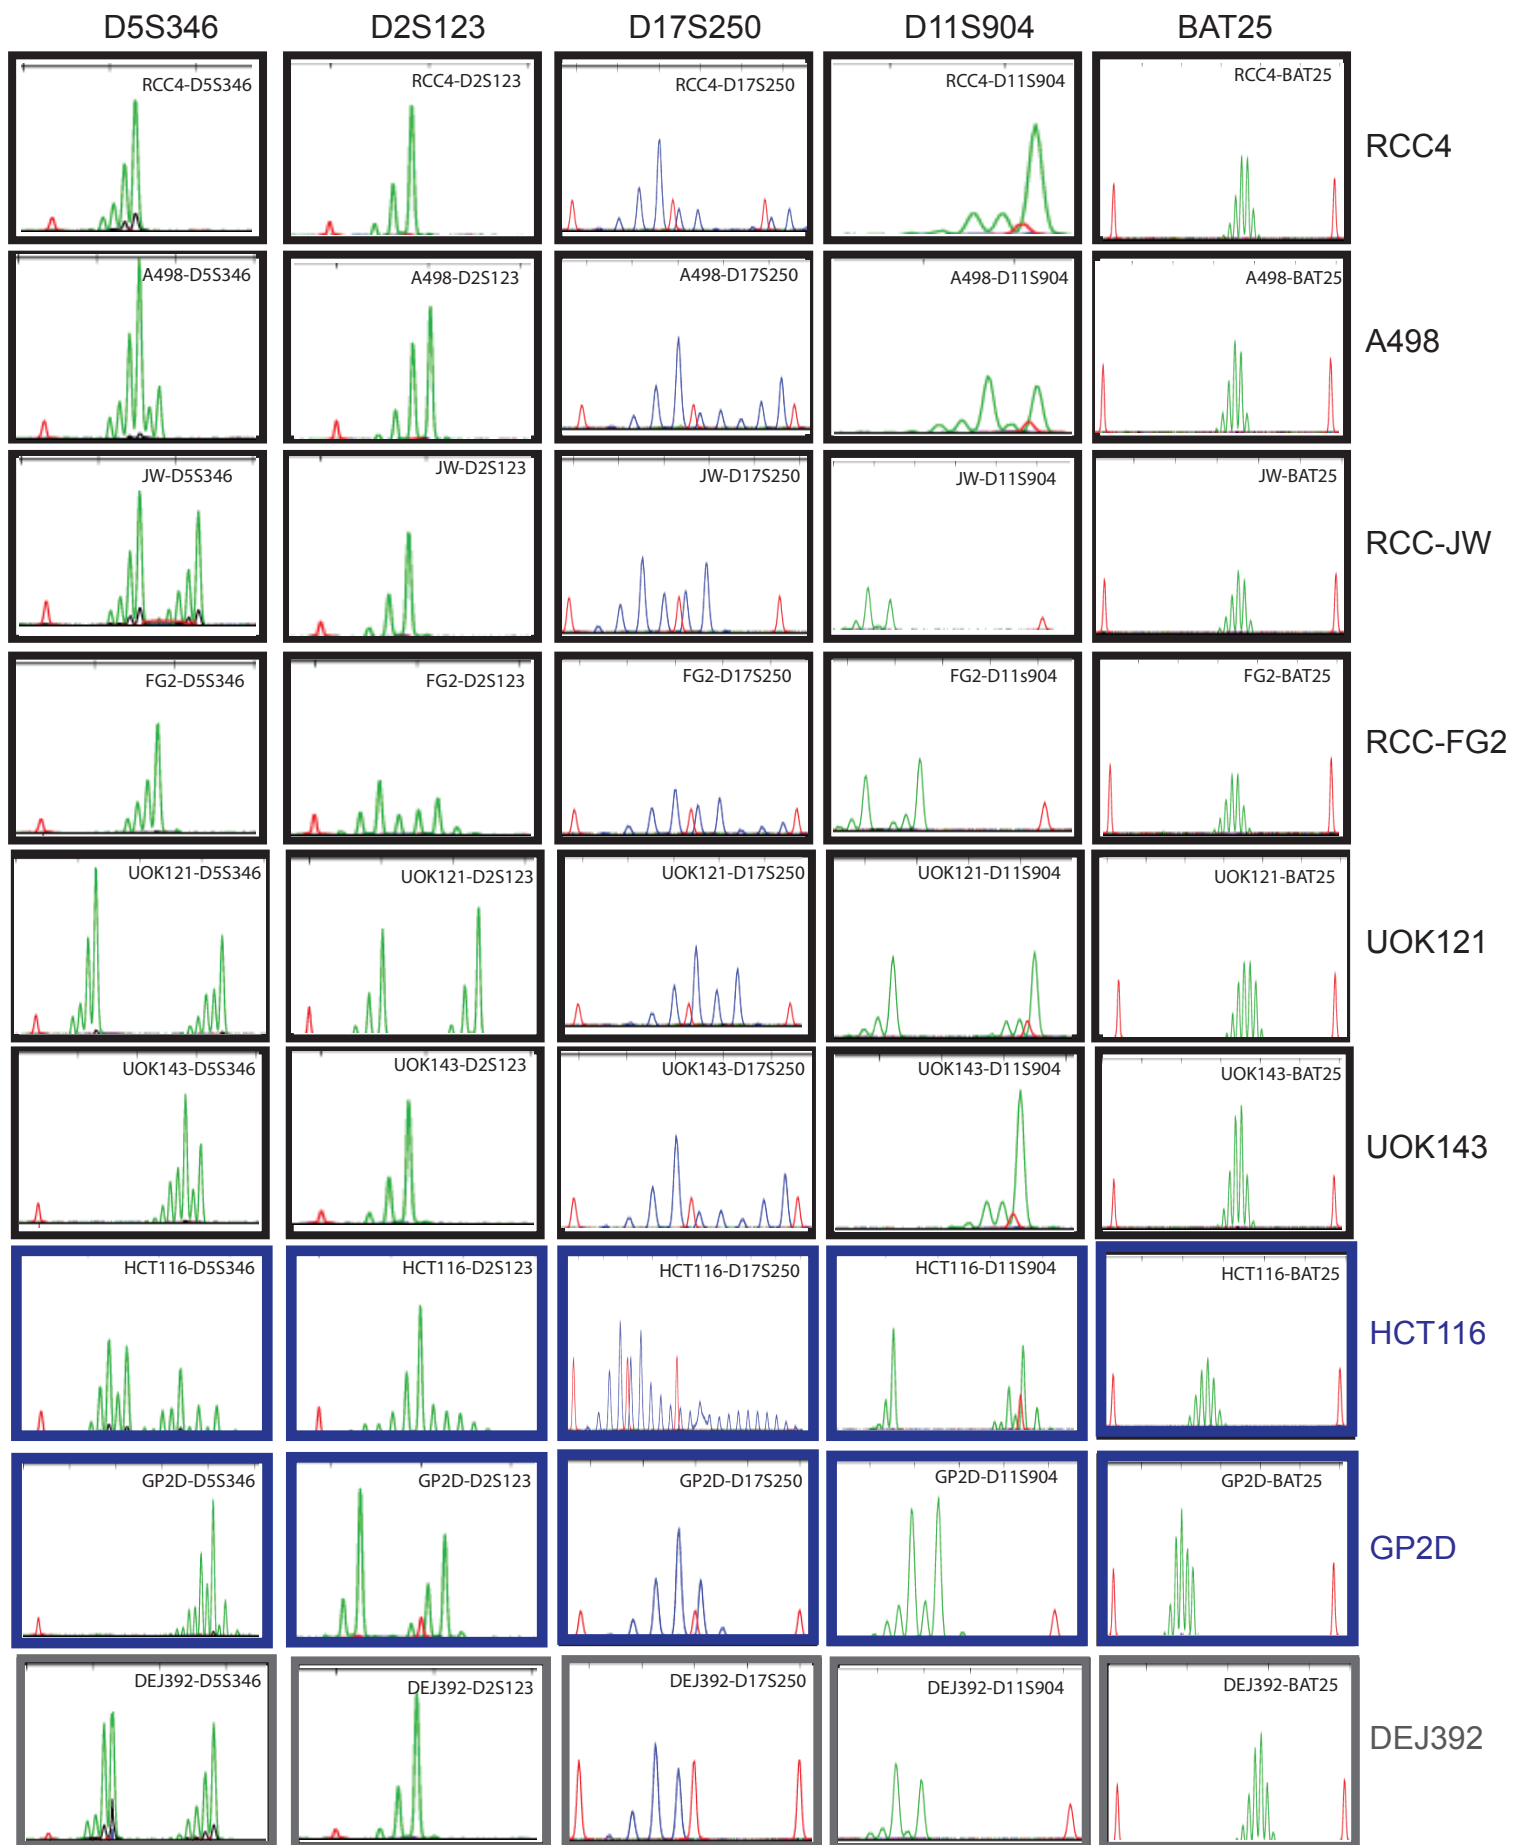

Supplement: NIHMS61748-supplement-Figure_S7v.pdf [file NIHMS61748-supplement-Figure_S7v.pdf]

**Figure S8.** Transcriptional and replication alterations following SETD2 depletion by siRNA

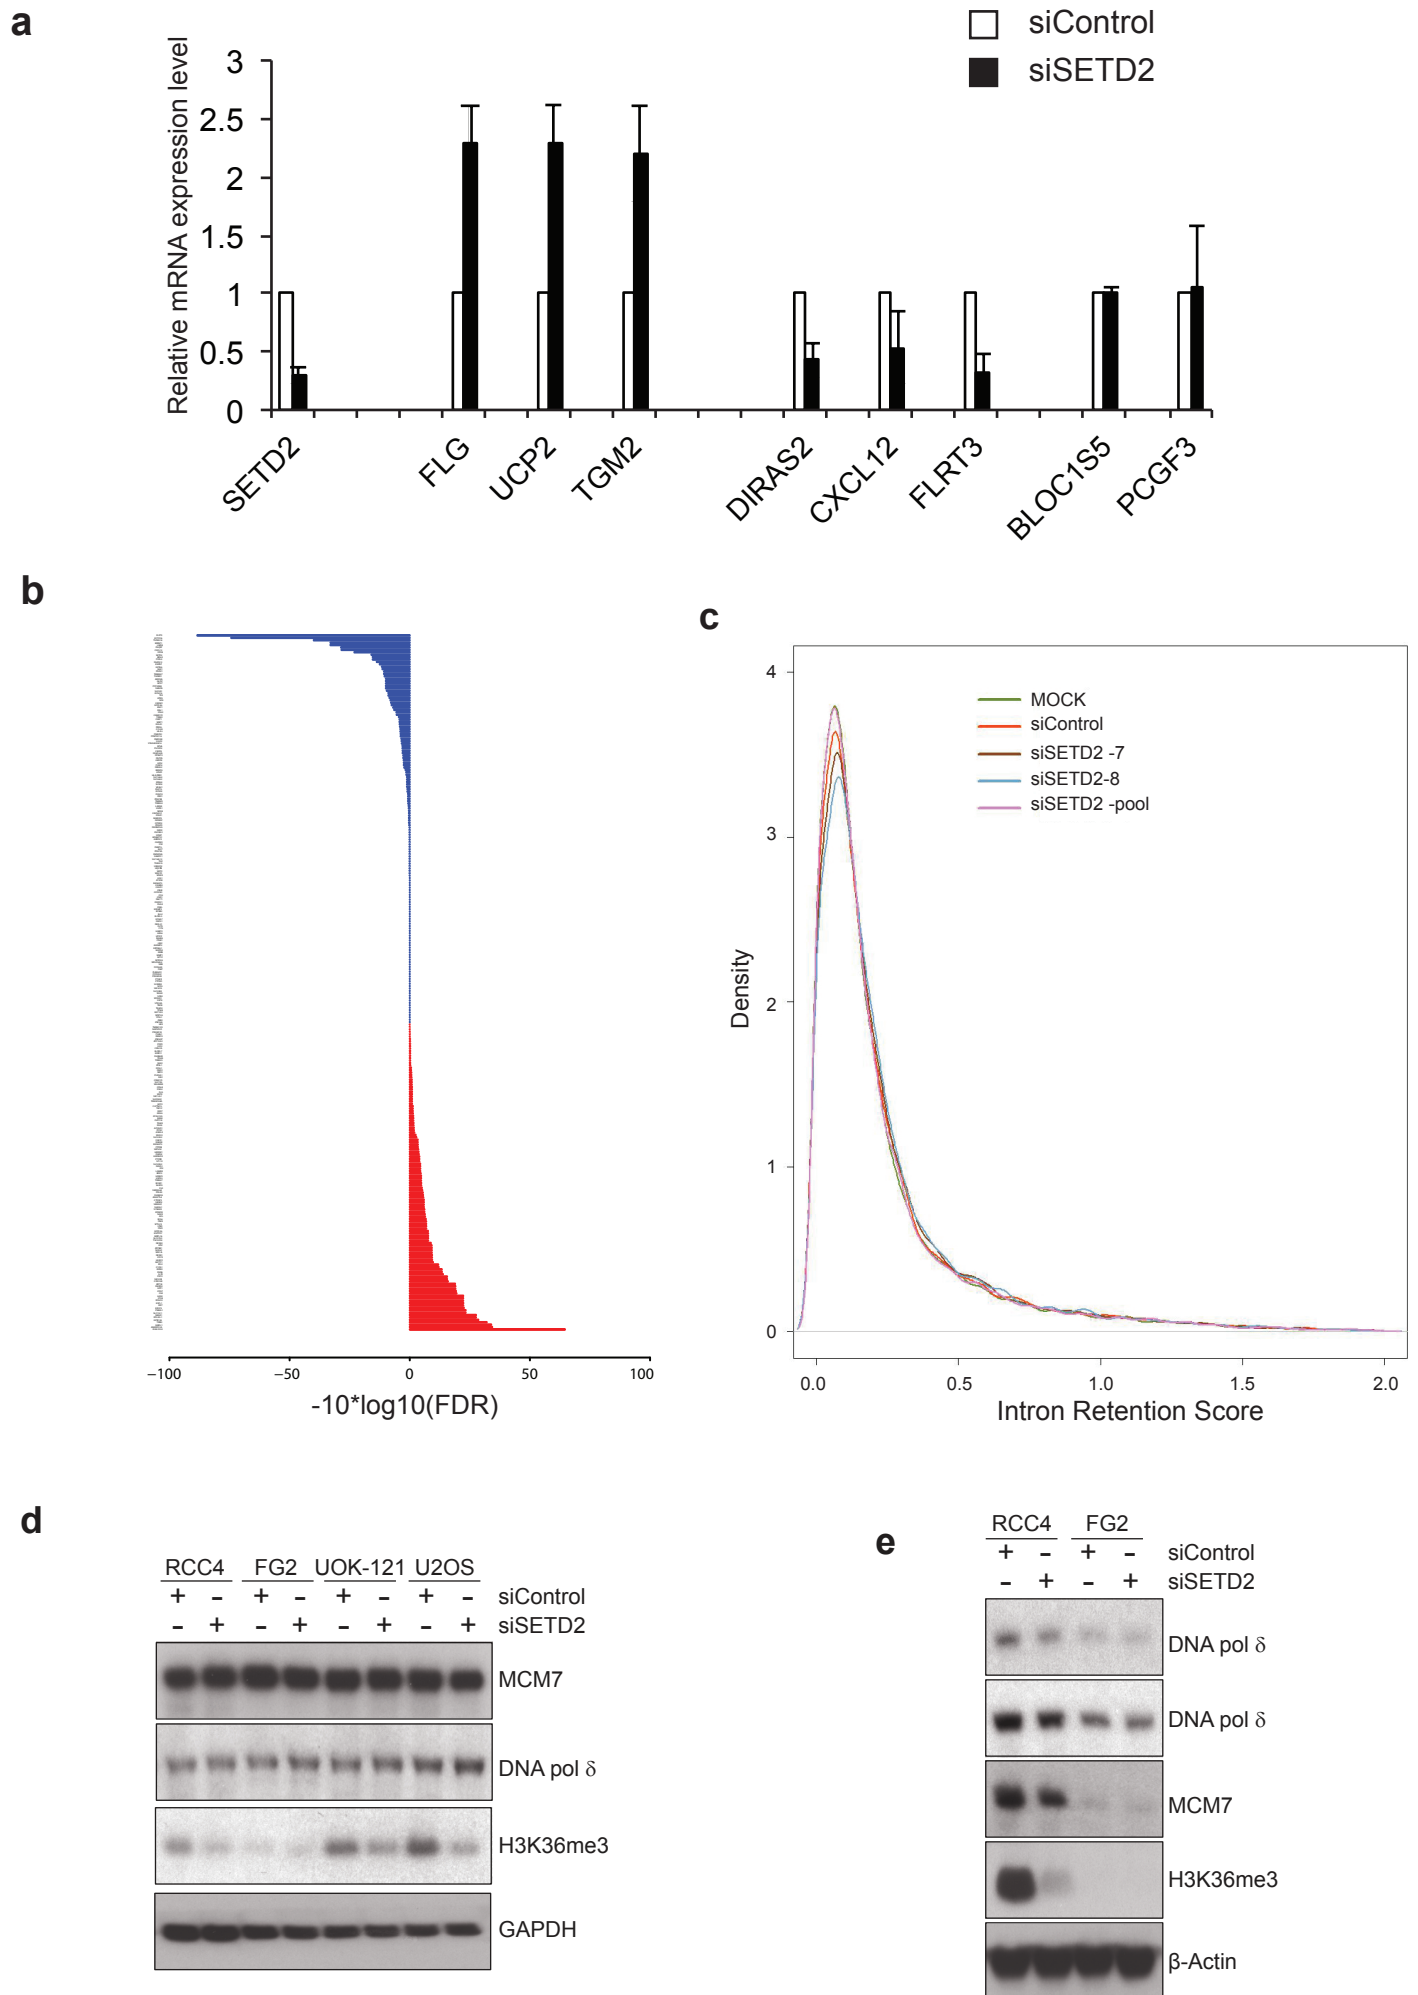

Supplement: NIHMS61748-supplement-Figure_S8.pdf [file NIHMS61748-supplement-Figure_S8.pdf]
